# Supplementary material
Source: ML conference proceedings conference paper supplement (https://openaccess.thecvf.com/content/WACV2025/html/Rozumnyi_XR-MBT_Multi-Modal_Full_WACV_2025_paper.html)
Supplement: Supplementary file 1 [file Rozumnyi_XR-MBT_Multi-Modal_Full_WACV_2025_supplemental.zip]

# **XR-MBT: Multi-modal Full Body Tracking for XR through Self-Supervision with Learned Depth Point Cloud Registration - Supplementary Material**

Denys Rozumnyi      Nadine Bertsch      Othman Sbai      Filippo Arcadu      Yuhua Chen  
Artsiom Sanakoyeu      Manoj Kumar      Catherine Herold      Robin Kips

Meta Reality Labs Zurich

## **1. Extended ablation study results**

Table 1 shows an extended version of the ablation study from Table 1 of the main paper. The results on motions with body parts well covered by the depth signal show the benefits of training the MPE network to grasp and leverage semantic information. On the one hand, this is achieved by training an SPC decoder to predict semantics and by adding our novel SPC-loss. However, note that only part of the sequences contains active motions and that our vanilla MPE solution is sufficient for more common and symmetric motion categories, such as bare walking already. The previous state-of-the-art AGRoL is outperformed in all cases.

## **2. Qualitative results**

This section provides qualitative results in Fig. 3 and Fig. 2. Furthermore, we have attached a video in the Supplementary Material.

## **3. Failure cases**

Failure cases occur when lower body motion happens outside the field of view of the sensor, such as in Fig. 1.

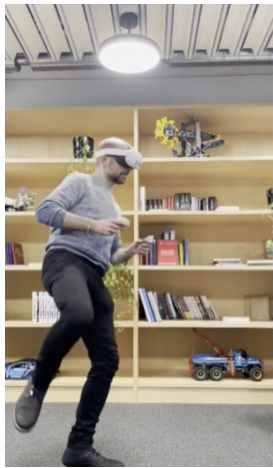

Third-person view

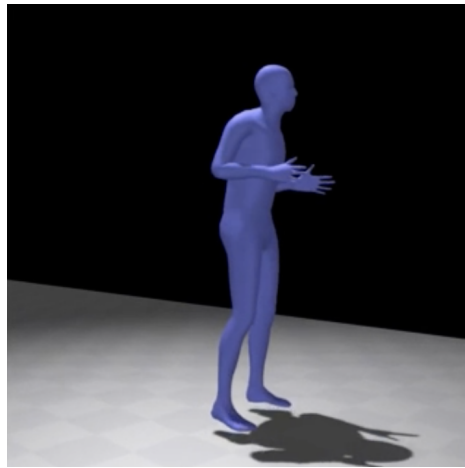

AGRoL

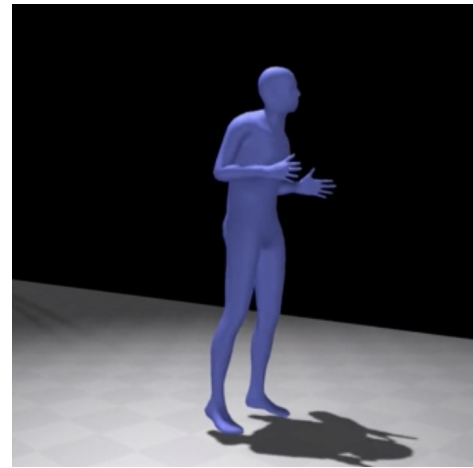

XR-MBT (ours)

Figure 1. A failure in case of limited field of view, *i.e.* the lifted right leg is not visible to the XR device.

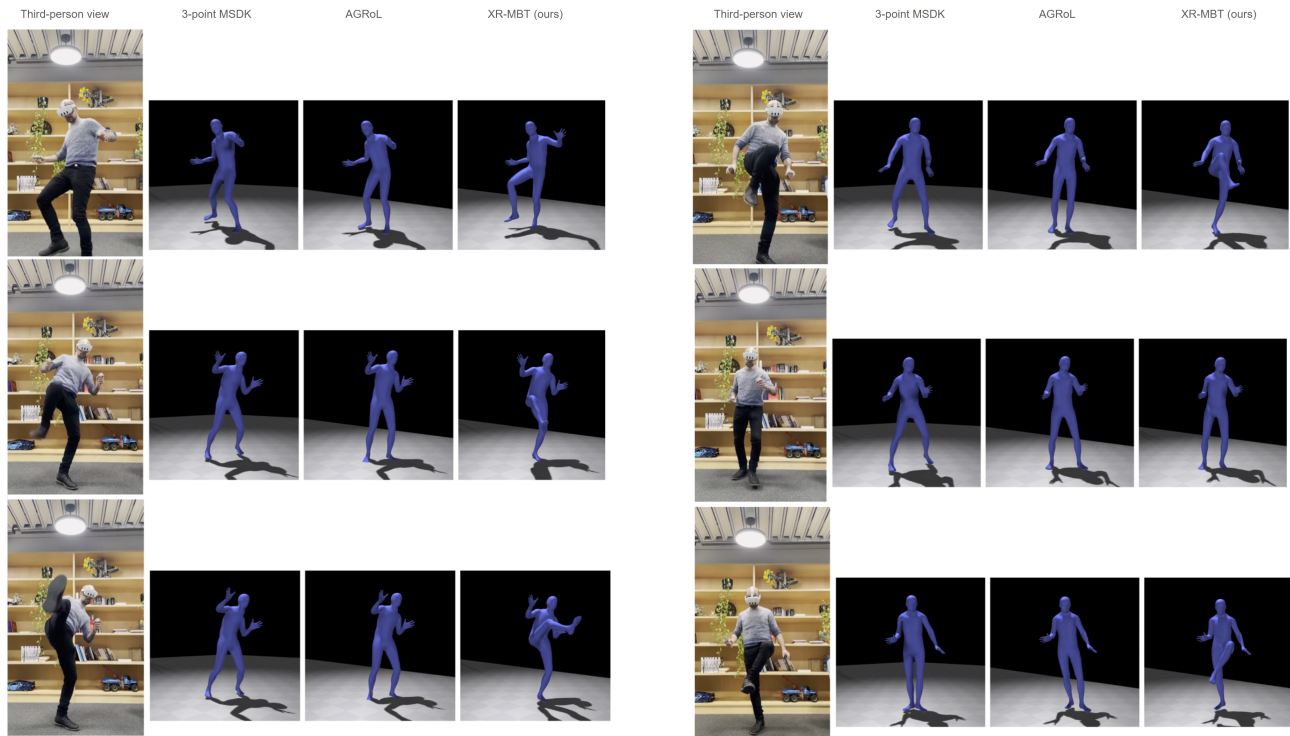

Figure 2. Additional results on real data.

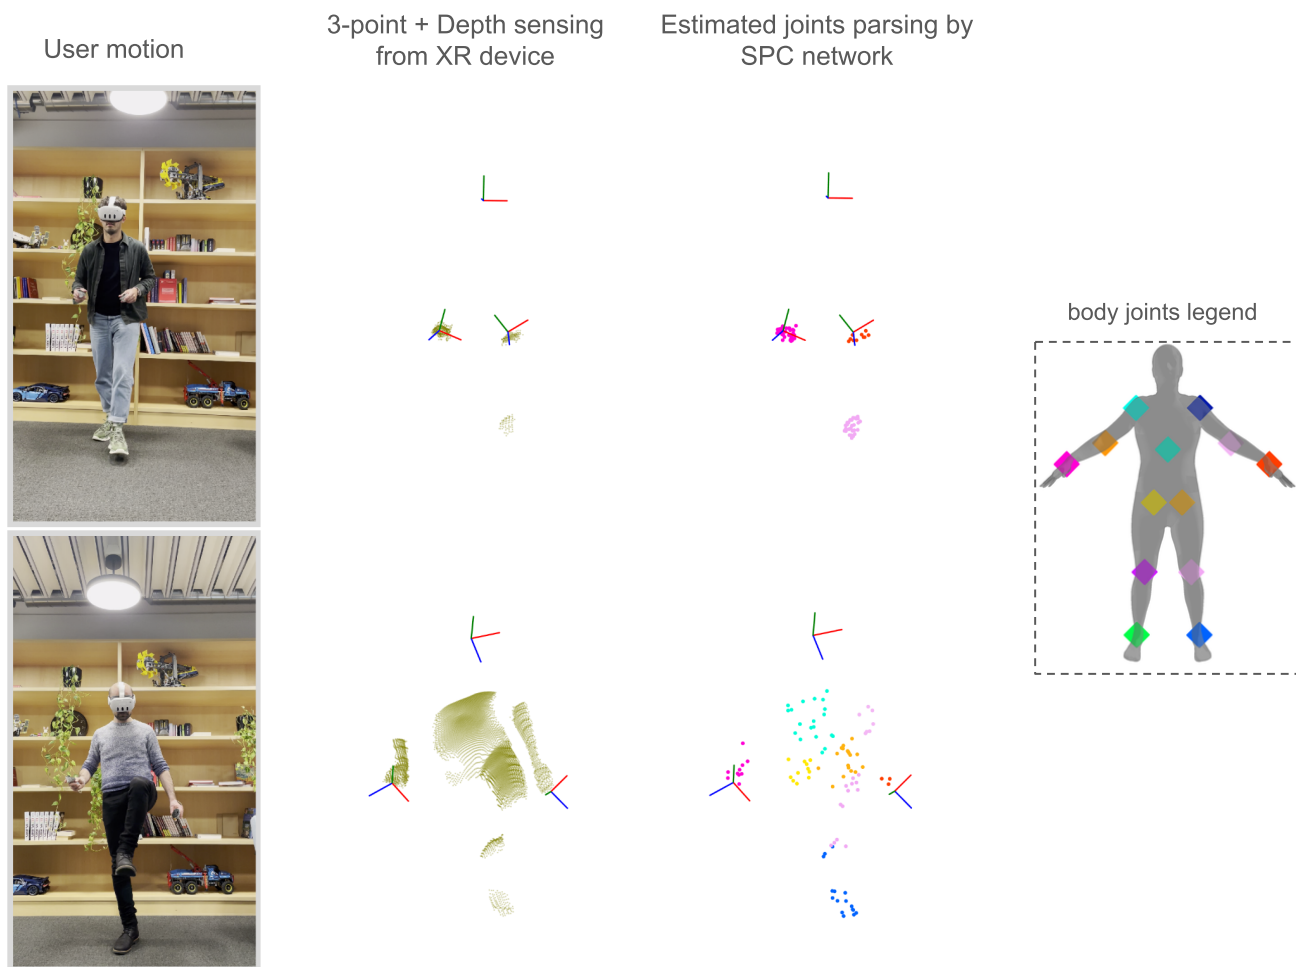

Figure 3. Additional point cloud labeling results.

| Model                        | MPJPE (cm)  |              | MPJRE (radians) |             | MPJVE ( $m^2/s^3$ ) |              | jitter (pred/gt) |             | PC-loss     |
|------------------------------|-------------|--------------|-----------------|-------------|---------------------|--------------|------------------|-------------|-------------|
|                              | up          | low          | up              | low         | up                  | low          | up               | low         |             |
| All Motions                  |             |              |                 |             |                     |              |                  |             |             |
| AGRoL (retrained)            | 1.87        | 11.21        | 1.79            | 2.30        | 10.27               | 34.36        | <b>2.55</b>      | <b>6.19</b> | 0.61        |
| MPE                          | 1.78        | 9.62         | 1.75            | 2.23        | 9.94                | 31.89        | 3.22             | 12.66       | 0.39        |
| MPE + SPC-decoder            | 1.77        | 9.30         | 1.75            | <b>2.21</b> | 9.95                | 32.41        | 3.11             | 12.98       | 0.34        |
| MPE + SPC-decoder + PC-loss  | 1.78        | 10.25        | 1.76            | 2.25        | 9.96                | 32.97        | 2.84             | 9.43        | 0.48        |
| MPE + SPC-decoder + SPC-loss | <b>1.76</b> | <b>9.27</b>  | <b>1.74</b>     | <b>2.21</b> | <b>9.78</b>         | <b>31.40</b> | 2.88             | 9.47        | <b>0.32</b> |
| Kicking                      |             |              |                 |             |                     |              |                  |             |             |
| AGRoL (retrained)            | 1.58        | 10.21        | 1.63            | 2.05        | 10.28               | 39.22        | <b>1.87</b>      | <b>3.32</b> | 0.80        |
| MPE                          | 1.49        | 8.27         | 1.61            | 2.01        | 10.11               | 36.56        | 2.31             | 7.6         | 0.39        |
| MPE + SPC-decoder            | <b>1.48</b> | 7.97         | 1.61            | 1.99        | 10.25               | 37.77        | 2.23             | 7.88        | 0.33        |
| MPE + SPC-decoder + PC-loss  | 1.50        | 8.91         | 1.62            | 2.02        | 10.26               | 38.98        | 2.08             | 5.70        | 0.51        |
| MPE + SPC-decoder + SPC-loss | <b>1.48</b> | <b>7.78</b>  | <b>1.59</b>     | <b>1.98</b> | <b>10.11</b>        | <b>36.42</b> | 2.18             | 5.93        | <b>0.28</b> |
| Knee strikes                 |             |              |                 |             |                     |              |                  |             |             |
| AGRoL (retrained)            | 1.63        | 10.67        | 1.58            | 2.03        | 9.97                | 39.97        | <b>1.91</b>      | <b>3.34</b> | 0.32        |
| MPE                          | 1.57        | <b>9.36</b>  | 1.55            | 1.95        | <b>9.83</b>         | <b>38.56</b> | 2.28             | 7.81        | <b>0.25</b> |
| MPE + SPC-decoder            | <b>1.51</b> | 9.38         | <b>1.54</b>     | <b>1.93</b> | 9.89                | 38.79        | 2.28             | 7.81        | 0.30        |
| MPE + SPC-decoder + PC-loss  | 1.53        | 10.16        | 1.56            | 2.00        | 9.91                | 40.68        | 2.21             | 5.96        | 0.33        |
| MPE + SPC-decoder + SPC-loss | 1.57        | <b>9.36</b>  | 1.57            | 1.95        | <b>9.83</b>         | <b>38.56</b> | 2.30             | 7.18        | <b>0.25</b> |
| Elbow knee strikes           |             |              |                 |             |                     |              |                  |             |             |
| AGRoL (retrained)            | 2.14        | 11.82        | 1.87            | 2.29        | 2.09                | 5.54         | <b>1.56</b>      | <b>2.50</b> | 0.35        |
| MPE                          | 2.09        | 10.27        | 1.85            | <b>2.23</b> | <b>2.08</b>         | <b>5.35</b>  | 1.75             | 5.27        | <b>0.24</b> |
| MPE + SPC-decoder            | <b>2.06</b> | 10.38        | 1.82            | 2.37        | 2.10                | 5.54         | 1.80             | 5.86        | 0.26        |
| MPE + SPC-decoder + PC-loss  | 2.08        | 11.36        | 1.83            | 2.41        | 2.10                | 5.64         | 1.66             | 4.32        | 0.35        |
| MPE + SPC-decoder + SPC-loss | 2.09        | <b>10.17</b> | <b>1.83</b>     | 2.34        | <b>2.08</b>         | <b>5.35</b>  | 1.75             | 5.27        | 0.26        |
| Walking                      |             |              |                 |             |                     |              |                  |             |             |
| AGRoL (retrained)            | 1.33        | 5.77         | 1.45            | 1.63        | 7.41                | 23.65        | <b>1.79</b>      | <b>2.41</b> | 0.82        |
| MPE                          | 1.27        | <b>5.42</b>  | 1.44            | <b>1.59</b> | <b>7.21</b>         | <b>23.19</b> | 2.09             | 4.80        | <b>0.62</b> |
| MPE + SPC-decoder            | <b>1.22</b> | 5.61         | <b>1.42</b>     | 1.64        | 7.36                | 24.00        | 2.19             | 6.10        | 0.65        |
| MPE + SPC-decoder + PC-loss  | 1.23        | 5.82         | 1.43            | 1.66        | 7.35                | 24.25        | 2.00             | 4.07        | 0.74        |
| MPE + SPC-decoder + SPC-loss | 1.25        | 5.44         | 1.45            | 1.70        | 7.22                | <b>23.19</b> | 2.09             | 4.80        | <b>0.62</b> |

Table 1. Ablation study on the Mocap data test set with synthetically generated point clouds. Metrics are reported separately for the upper (up) and lower (low) body.
